# Supplementary material for: A Cancer-Specific Monoclonal Antibody against HER2 Exerts Antitumor Activities in Human Breast Cancer Xenograft Models
Source: MDPI journal article supplement (doi:10.3390/ijms25031941), 2024-02-05
Supplement: s1 [file s1]

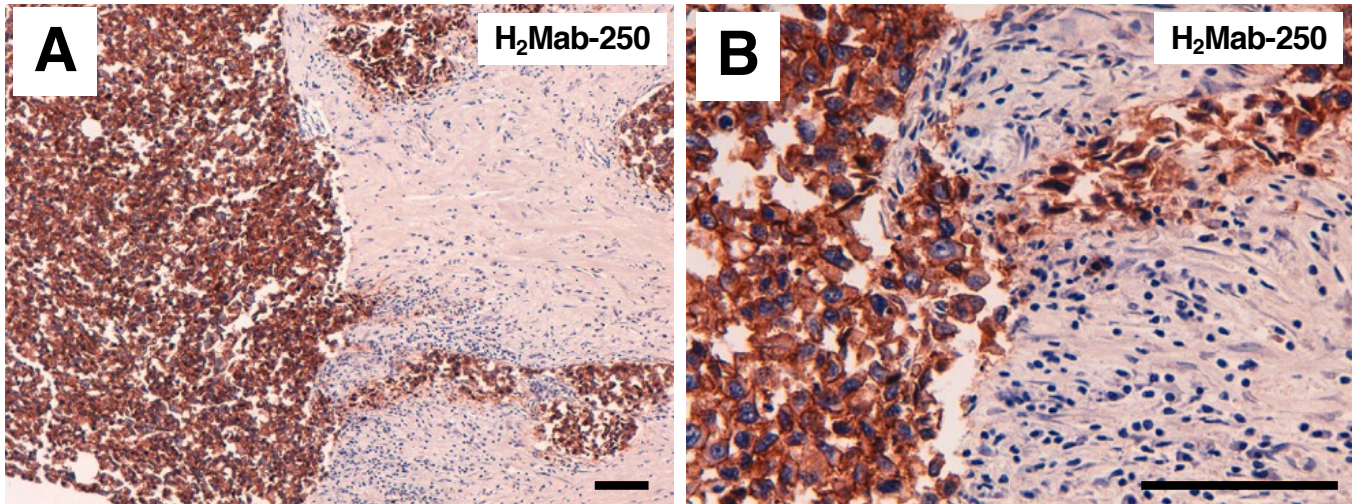

**Supplemental Figure S1 Immunohistochemical analysis of H<sub>2</sub>Mab-250 in a breast cancer tissue section without antigen retrieval.** A HER2-positive breast cancer tissue sections were treated with H<sub>2</sub>Mab-250 (1  $\mu$ g/mL; **A, B**). The sections were then treated with the Envision+ kit. The chromogenic reaction was performed using DAB, and the sections were counterstained with hematoxylin. Scale bar = 100  $\mu$ m.
